# Supplementary material for: One-pot hydrothermal preparation and defect-enhanced photocatalytic activity of Bi-doped CdWO4 nanostructures
Source: Royal Society of Chemistry journal article supplement (doi:10.1039/d1cp02885e), 2022-01-01
Supplement: d1cp02885e1.pdf [file d1cp02885e1.pdf]

## One - Pot Hydrothermal Preparation and Defects Enhanced Photocatalytic Activity of Bi doped CdWO<sub>4</sub> Nanostructures

Kura Narsimha<sup>a</sup>, N. Anuradha<sup>a</sup>, Kathi Sudarshan<sup>b</sup>, Ashish Chhaganlal Gandhi<sup>c</sup>, A. Krishnam  
Raju<sup>a</sup>, P. Muralidhar Reddy<sup>a</sup>, Radhika Mone<sup>d</sup>, G. Upender<sup>e,†</sup>, B. Vijaya Kumar<sup>a,†</sup>

<sup>a</sup>Nanomaterials & Catalysis Research Laboratory, Department of Chemistry,  
University College of Science, Osmania University, Hyderabad-500 007, Telangana, India.

<sup>b</sup>Radiochemistry Division, Bhabha Atomic Research Centre, Mumbai-400 085, India

<sup>c</sup>Department of Physics, National Dong Hwa University, Hualien 97401, Taiwan

<sup>d</sup>Department of Chemistry, Nizam College, Osmania University, Hyderabad- 500 001,  
Telangana, India

<sup>e</sup>Department of Physics, University College of Science, Osmania University, Hyderabad- 500  
007, Telangana, India.

†These corresponding authors are equally contributed to this work:

[vijaychemou@osmania.ac.in](mailto:vijaychemou@osmania.ac.in) (Dr. B. Vijaya Kumar), [upenderg@osmania.ac.in](mailto:upenderg@osmania.ac.in) (Dr. G.  
Upender)

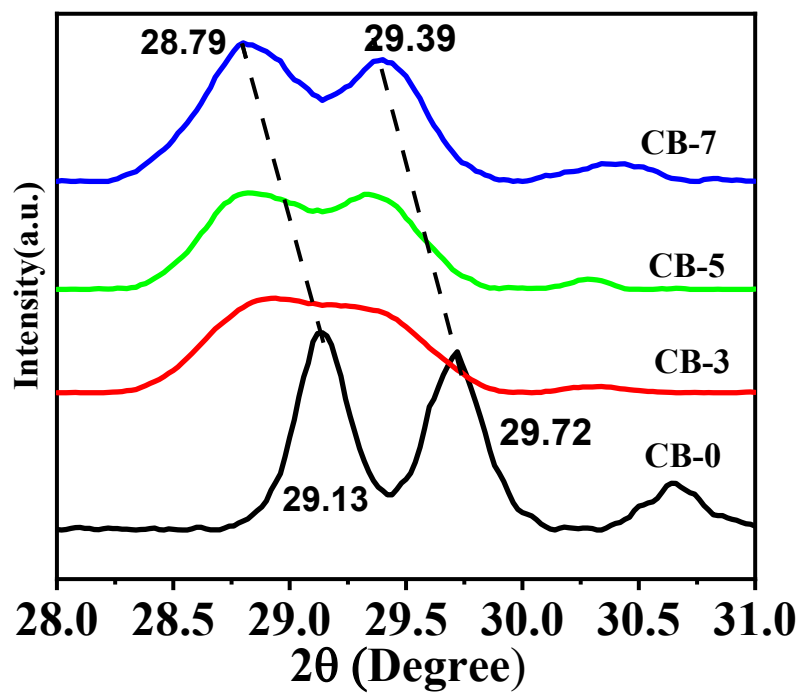

Figure S1. Powder X- ray diffraction peak shift

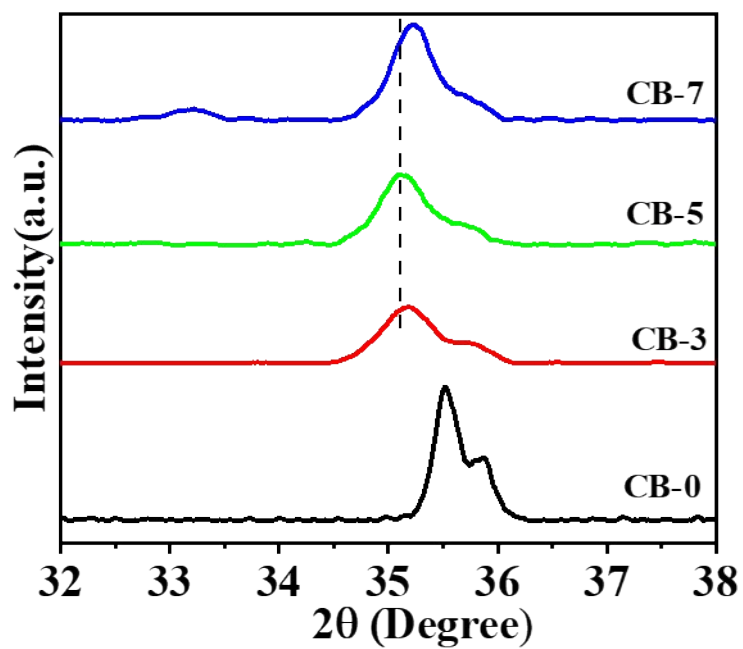

Figure S2. Powder X- ray diffraction peak shift

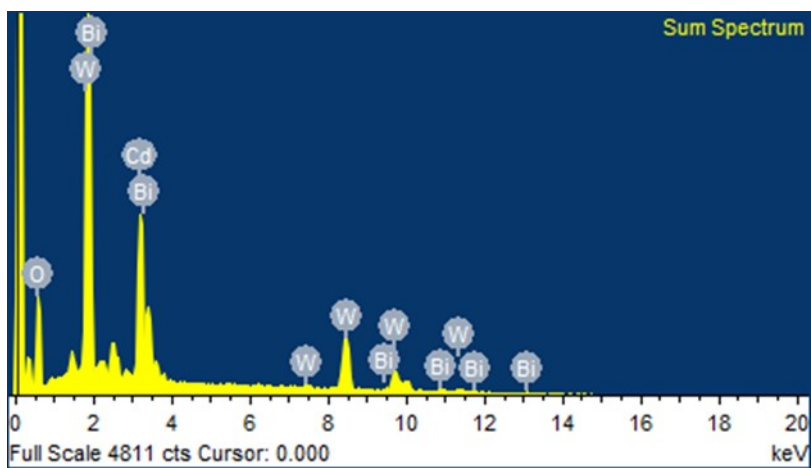

Figure S3. EDX spectra of CB-5 sample.
